# Supplementary material for: A Single Base Insertion in F9 Causing Hemophilia B in a Family of Newfoundland–Parti Standard Poodle Hybrid Dogs
Source: MDPI journal article supplement (doi:10.3390/genes12101491), 2021-09-24
Supplement: s1 [file s1]

## A single base insertion in *F9* causing hemophilia B in a family of Newfoundland-Parti Standard Poodle hybrid dogs.

**Supplemental Table S1:** Primer sequences used for DNA amplification and sequencing of canine *F9* exons and adjacent regions and primer sequences used for TaqMan® SNP Genotyping Assay for *F9* insertion.

| Exon                         | Binding Site | Primer Sequence                       | Amplicon Size (bp) |
|------------------------------|--------------|---------------------------------------|--------------------|
| 1                            | 5' UTR       | F: 5'-TGTGTCACCTCCGGCTTCAG-3'         | 67                 |
|                              | Intron 1     | R: 5'-TCTACAGCTAGAAGACAAGCATAC-3'     |                    |
| 2                            | Intron 1     | F: 5'-TTGAATTTTCAGTTTTTCTTGATCG-3'    | 164                |
|                              | Intron 2     | R: 5'-TGCATCTGAAGAACATTACGC-3'        |                    |
| 3                            | Intron 2     | F: 5'-GCAGTTTTGAAGAAGCACGGG-3'        | 25                 |
|                              | Intron 3     | R: 5'-ACACAGAGAAAAGATACCTAATTCTCA-3'  |                    |
| 4                            | Intron 3     | F: 5'-AAGACAGGGGCATCCCATATC-3'        | 114                |
|                              | Intron 4     | R: 5'-CTTCCATTAAGTGTTCTTACCAC-3'      |                    |
| 5                            | Intron 4     | F: 5'-CTCCCAAGCCTCTTTCCATG-3'         | 129                |
|                              | Intron 5     | R: 5'-CAAACAGGGTTTATGAAAGTATGTGAAC-3' |                    |
| 6                            | Intron 5     | F: 5'-CGTTCCGCTTGCCAATGAAAAATA-3'     | 197                |
|                              | Intron 6     | R: 5'-CTCTGGGCTCCAGTTTTTGAC-3'        |                    |
| 7                            | Intron 6     | F: 5'-ACACCCCTGCCTATCAACAG-3'         | 115                |
|                              | Intron 7     | R: 5'-GCTCCTCTAGCATTAGCCC-3'          |                    |
| 8                            | Intron 7     | F: 5'-CCTTGGCAAATACGTTTATGTGTAAG-3'   | 548                |
|                              | 3' UTR       | R: 5'-TGCCAAGGAGGGGAGAATC-3'          |                    |
| TaqMan® SNP Genotyping Assay |              |                                       |                    |
| 8                            | Intron 7     | F: 5'-TGTAAGTCTACCTGTGACTGAAGAGAA-3'  | 90                 |
|                              | 3' UTR       | R: 5'-CGTTTCGCTTCTGCTCTGTATGT-3'      |                    |
|                              | VICTM        | 5'-TCTTCTCGGTGTTATGC-3'               |                    |
|                              | FAMTM        | 5'-TTCTCGGTGTTTATGC-3'                |                    |

bp, base pairs; F, forward primer; R, reverse Primer; UTR, untranslated region; VIC™, Dye label at 5' end; FAM™, Dye label at 5' end (Thermo Fisher Scientific)

Standard PCR protocol was used: 1) Pre- Denaturation (95°C, 5 min); 2) Denaturation (95°C, 0.5 min); 3) Annealing (59.5°C, 0.5 min); 4) Elongation (72°C, 1 min); 5) Denaturation 95°C, 45 sec); 6) Annealing (59.5°C, 45 sec); 7) Elongation (72°C, 45 sec); 8) Final elongation (72°C, 10 min); and 9) Cooling (4°C, ~2 hours). Step 2-4 (9 cycles), and step 5-7 (30 cycles).
